# Supplementary material for: Point Sensor Networks Struggle to Detect and Quantify Short Controlled Releases at Oil and Gas Sites
Source: MDPI journal article supplement (doi:10.3390/s24082419), 2024-04-10
Supplement: s1 [file s1]

## **Supplementary Information**

Point Sensor Networks Struggle to Detect and  
Quantify Short Controlled Releases at Oil and Gas  
Sites

April 9, 2024

## Contents

|                                                            |           |
|------------------------------------------------------------|-----------|
| <b>S-1Introduction</b>                                     | <b>S1</b> |
| <b>S-2Materials and Methods</b>                            | <b>S2</b> |
| S-2.1 Solution Deployment . . . . .                        | S3        |
| S-2.2 Challenge Release Equipment . . . . .                | S4        |
| S-2.3 Challenge Release Detection Classification . . . . . | S7        |
| <b>S-3Results and Discussion</b>                           | <b>S8</b> |
| S-3.1 Probability of Detection . . . . .                   | S14       |
| S-3.2 Mixing Ratio Results . . . . .                       | S16       |
| S-3.3 Site Rate Quantification Results . . . . .           | S16       |

## List of Figures

|                                              |     |
|----------------------------------------------|-----|
| S-1 Field point sensors . . . . .            | S1  |
| S-2 Aerial image of sites 1 - 3 . . . . .    | S3  |
| S-3 Aerial image of sites 4 - 7 . . . . .    | S3  |
| S-4 Aerial image of sites 8 - 11 . . . . .   | S3  |
| S-5 Challenge release location . . . . .     | S4  |
| S-6 Gas field tap . . . . .                  | S4  |
| S-7 Mobile release rig . . . . .             | S5  |
| S-8 Release rig flow diagram . . . . .       | S5  |
| S-9 Challenge release durations . . . . .    | S6  |
| S-10 Challenge release rates . . . . .       | S6  |
| S-11 Downwind mixing ratio area . . . . .    | S7  |
| S-12 Binned estimates Site 1 . . . . .       | S8  |
| S-13 Binned estimates Site 2 . . . . .       | S9  |
| S-14 Binned estimates Site 3 . . . . .       | S9  |
| S-15 Binned estimates Site 4 . . . . .       | S10 |
| S-16 Binned estimates Site 5 . . . . .       | S10 |
| S-17 Binned estimates Site 6 . . . . .       | S11 |
| S-18 Binned estimates Site 7 . . . . .       | S11 |
| S-19 Binned estimates Site 8 . . . . .       | S12 |
| S-20 Binned estimates Site 9 . . . . .       | S12 |
| S-21 Binned estimates Site 10 . . . . .      | S13 |
| S-22 Binned estimates Site 11 . . . . .      | S13 |
| S-23 POD logistic regression curve . . . . . | S14 |
| S-24 Sensor per area . . . . .               | S15 |

|      |                                                          |     |
|------|----------------------------------------------------------|-----|
| S-25 | Challenge release emission estimate histograms . . . . . | S17 |
| S-26 | ChR and NR emission estimate averages . . . . .          | S17 |

## List of Tables

|     |                            |     |
|-----|----------------------------|-----|
| S-1 | Site details . . . . .     | S2  |
| S-2 | Sensor Distances . . . . . | S16 |
| S-3 | Site baselines . . . . .   | S16 |

## S-1 Introduction

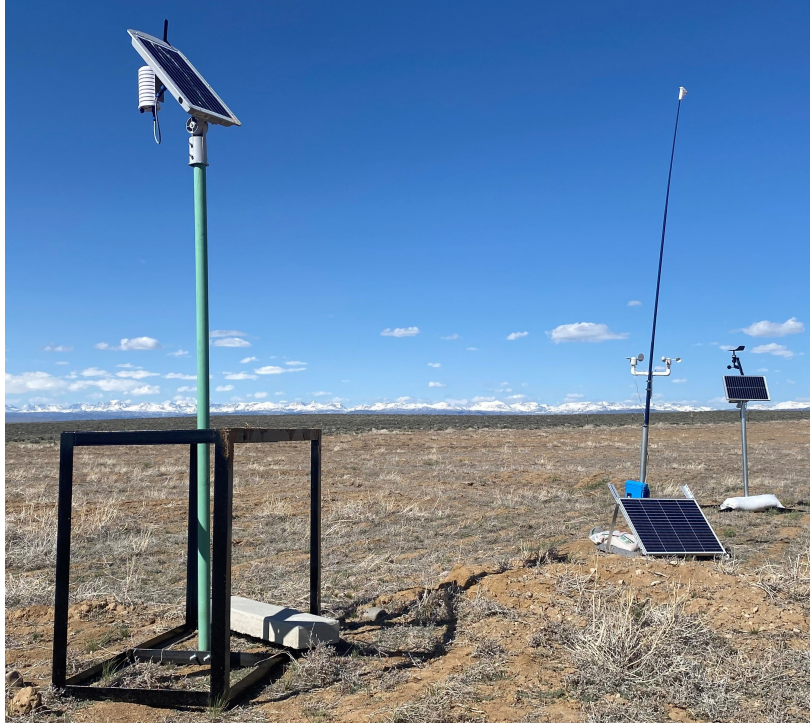

Figure S-1: Image of point sensors implemented on a site during the field campaign.

## S-2 Materials and Methods

Table S-1: Review of the field trial's deployments includes information on each site's size, basin, site type, exportable emission data, and site equipment.

| Deployment | Basin             | Operator | Site Number | Site Size (acres)  | Site Type           | Solution at Facility | Mixing Ratio Data | Site-Level Emission Estimate Data                                                                                                                                                                                                                | Site Equipment                                                                                                                                                                      |
|------------|-------------------|----------|-------------|--------------------|---------------------|----------------------|-------------------|--------------------------------------------------------------------------------------------------------------------------------------------------------------------------------------------------------------------------------------------------|-------------------------------------------------------------------------------------------------------------------------------------------------------------------------------------|
| 1          | Upper Green River | 1        | 1           | 9.5                | Production Site     | A                    | ✓                 |                                                                                                                                                                                                                                                  | Wellheads, line heaters, separators, dehydrators, combustors                                                                                                                        |
|            |                   |          |             |                    |                     | C                    | ✓                 |                                                                                                                                                                                                                                                  |                                                                                                                                                                                     |
|            |                   |          |             |                    |                     | D                    | ✓                 | ✓                                                                                                                                                                                                                                                |                                                                                                                                                                                     |
|            |                   |          |             |                    |                     | E                    | ✓                 | ✓                                                                                                                                                                                                                                                |                                                                                                                                                                                     |
|            |                   |          |             |                    |                     | F                    |                   | ✓                                                                                                                                                                                                                                                |                                                                                                                                                                                     |
|            |                   |          |             |                    |                     | G                    | ✓                 | ✓                                                                                                                                                                                                                                                |                                                                                                                                                                                     |
| 2          | Marcellus         | 2        | 2           | 2.5                | Production Site     | G                    | ✓                 | ✓                                                                                                                                                                                                                                                | Wellhead, sand separator, gas production unit, sales meter, produced water tank                                                                                                     |
|            |                   |          |             | Production Site    | ✓                   |                      | ✓                 | Wellhead, sand separator, gas production unit, sales meter, produced water tank                                                                                                                                                                  |                                                                                                                                                                                     |
|            |                   |          | 3           | 2.5                | Production Site     |                      | ✓                 | ✓                                                                                                                                                                                                                                                | Wellheads, gas production units, sales meter, pig launcher                                                                                                                          |
|            |                   |          | 4           | 2.5                | Production Site     |                      | ✓                 | ✓                                                                                                                                                                                                                                                | Wellheads, gas production units, sales meter, produced water tank, flat top tanks                                                                                                   |
|            | Utica             | 3        | 5           | 2.5                | Production Site     |                      | ✓                 | ✓                                                                                                                                                                                                                                                |                                                                                                                                                                                     |
|            |                   |          | 6           | 3.5                | Compressor Station  | E                    | ✓                 | ✓                                                                                                                                                                                                                                                | Pig receivers and launchers, slug catcher, compressor, vapor recovery unit, bullet tank, flare, natural gas condensate tank, triethylene glycol regenerators, discharge meter       |
|            |                   |          |             | Compressor Station | G                   | ✓                    | ✓                 |                                                                                                                                                                                                                                                  |                                                                                                                                                                                     |
|            |                   |          | 7           | 25                 | Cryogenic Gas Plant | E                    | ✓                 | ✓                                                                                                                                                                                                                                                | Pig receivers and launchers, slug catcher, cryogenic compressors, hot oil heaters, condensate water tanks, condensate stabilization heaters, produced water tanks, propane chillers |
|            |                   |          |             | Compressor Station | E                   | ✓                    | ✓                 | Pig receivers and launchers, slug catcher, compressors, inlet scrubber, sales meters, filter separator, bullet tanks, vapor recovery units condensate pumps, triethylene glycol regenerators, produced water tank, slop oil tank, blowdown stack |                                                                                                                                                                                     |
|            |                   |          |             | Compressor Station | G                   | ✓                    | ✓                 |                                                                                                                                                                                                                                                  |                                                                                                                                                                                     |
|            |                   |          |             | Compressor Station |                     |                      |                   |                                                                                                                                                                                                                                                  |                                                                                                                                                                                     |
|            |                   |          |             | Compressor Station |                     |                      |                   |                                                                                                                                                                                                                                                  |                                                                                                                                                                                     |
| 3          | Permian           | 4        | 9           | 7                  | Compressor Station  | C                    | ✓                 |                                                                                                                                                                                                                                                  | Flare, separators, scrubbers, oil and water tanks, vapor recovery towers, compressors, dehydrators, combustors, scrubber separators                                                 |
|            |                   |          |             |                    |                     | B                    | ✓                 |                                                                                                                                                                                                                                                  |                                                                                                                                                                                     |
|            |                   |          |             |                    |                     | D                    | ✓                 | ✓                                                                                                                                                                                                                                                |                                                                                                                                                                                     |
|            |                   |          |             |                    |                     | G                    | ✓                 | ✓                                                                                                                                                                                                                                                |                                                                                                                                                                                     |
|            |                   |          | 10          | 3.5                | Production Site     | C                    | ✓                 |                                                                                                                                                                                                                                                  | Flares, heater treaters, separators, gas scrubbers, oil and water tanks, vapor recovery towers                                                                                      |
|            |                   |          |             |                    |                     | B                    | ✓                 |                                                                                                                                                                                                                                                  |                                                                                                                                                                                     |
|            |                   |          |             |                    |                     | D                    | ✓                 | ✓                                                                                                                                                                                                                                                |                                                                                                                                                                                     |
|            |                   |          |             |                    |                     | G                    | ✓                 | ✓                                                                                                                                                                                                                                                |                                                                                                                                                                                     |
|            |                   |          | 11          | 2                  | Production Site     | C                    | ✓                 |                                                                                                                                                                                                                                                  | Flares, heater treaters, separators, gas scrubbers, oil and water tanks, vapor recovery towers                                                                                      |
|            |                   |          |             |                    |                     | B                    | ✓                 |                                                                                                                                                                                                                                                  |                                                                                                                                                                                     |
|            |                   |          |             |                    |                     | D                    | ✓                 | ✓                                                                                                                                                                                                                                                |                                                                                                                                                                                     |
|            |                   |          |             |                    |                     | G                    | ✓                 | ✓                                                                                                                                                                                                                                                |                                                                                                                                                                                     |

## S-2.1 Solution Deployment

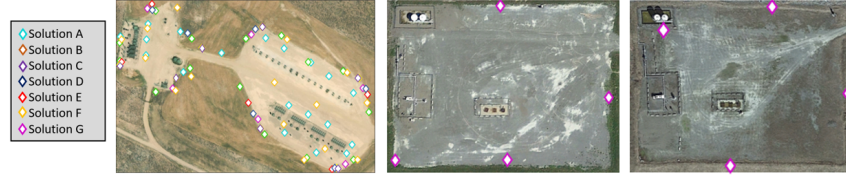

Figure S-2: The aerial images, from left to right, show sites 1, 2, and 3 with areas of 9, 2.5, and 2.5 acres, respectively. Site 1 is a production site in the Upper Green River basin and sites 2 and 3 are production sites in the Marcellus basin. Images from GoogleEarth.

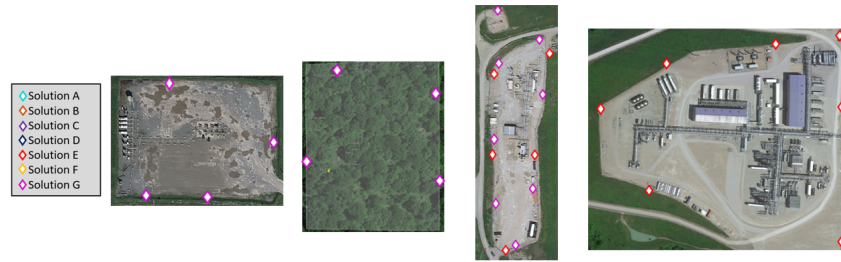

Figure S-3: Satellite images of sites 4, 5, 6, and 7 with areas of 2.5, 2.5, 3.5 and 19 acres, respectively. Sites 4 and 5 are production sites in the Marcellus basin, and sites 6 and 7 are gathering stations in the Utica basin. Images from GoogleEarth.

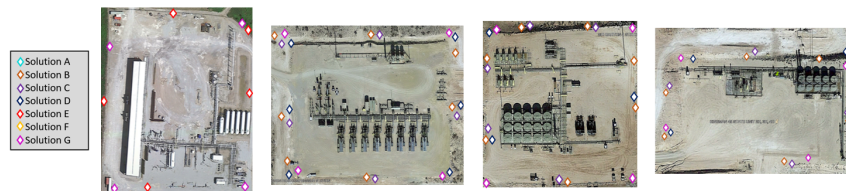

Figure S-4: The aerial images, from left to right, show sites 8, 9, 10, and 11 with areas of 5.5, 6.5, 2.5 and 2 acres, respectively. Sites 8 and 9 are gathering stations and sites 10 and 11 are production sites. Sites 9 – 11 are in the Permian basin and site 8 is in the Utica basin. Images from GoogleEarth.

## S-2.2 Challenge Release Equipment

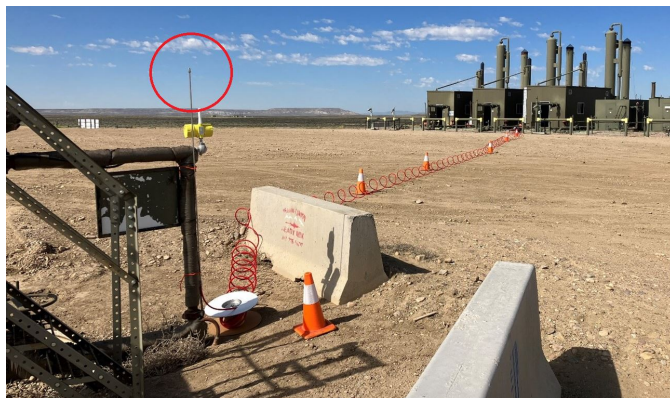

Figure S-5: A challenge release emission point during the campaign located adjacent to a wellhead and supplied gas from the challenge release rig located across the production pad near dehydration and separation equipment.

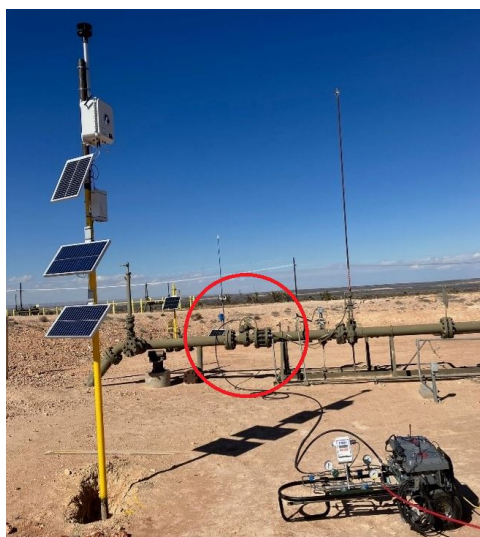

Figure S-6: Mobile release rig with supply inlet connected to the gas line at an oil and gas site during the field campaign.

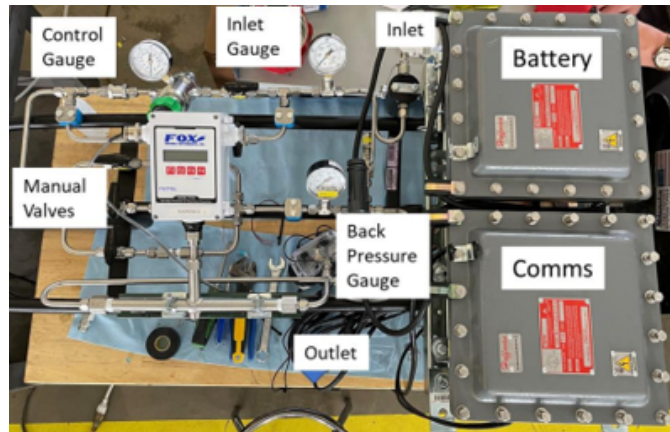

Figure S-7: Release rig constructed by Colorado State University.

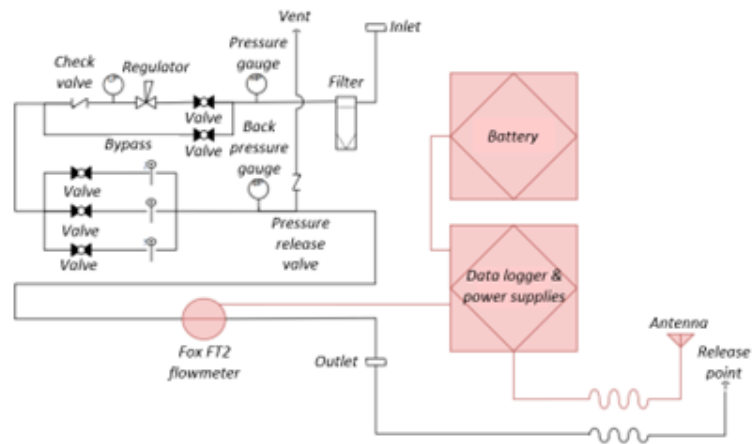

Figure S-8: Release rig flow diagram.



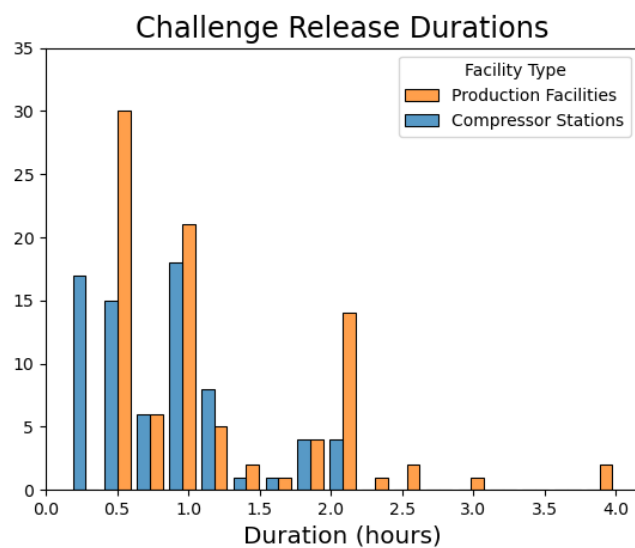

Figure S-9: Challenge release durations at production facilities and compressor stations during the field campaign.

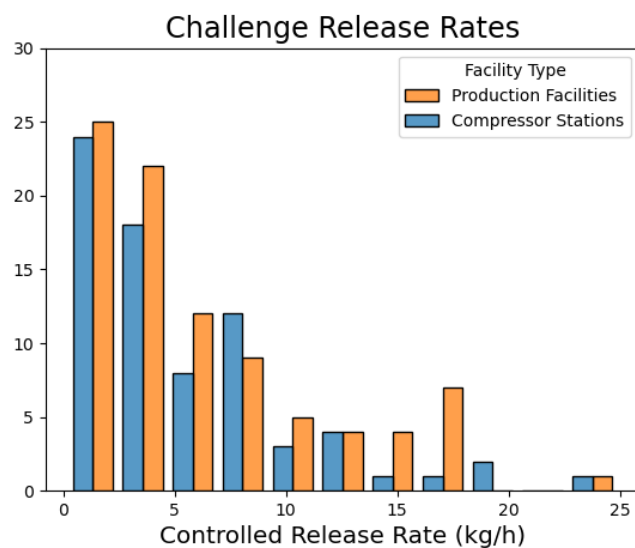

Figure S-10: Challenge release rates at production facilities and compressor stations during the field campaign.

### S-2.3 Challenge Release Detection Classification

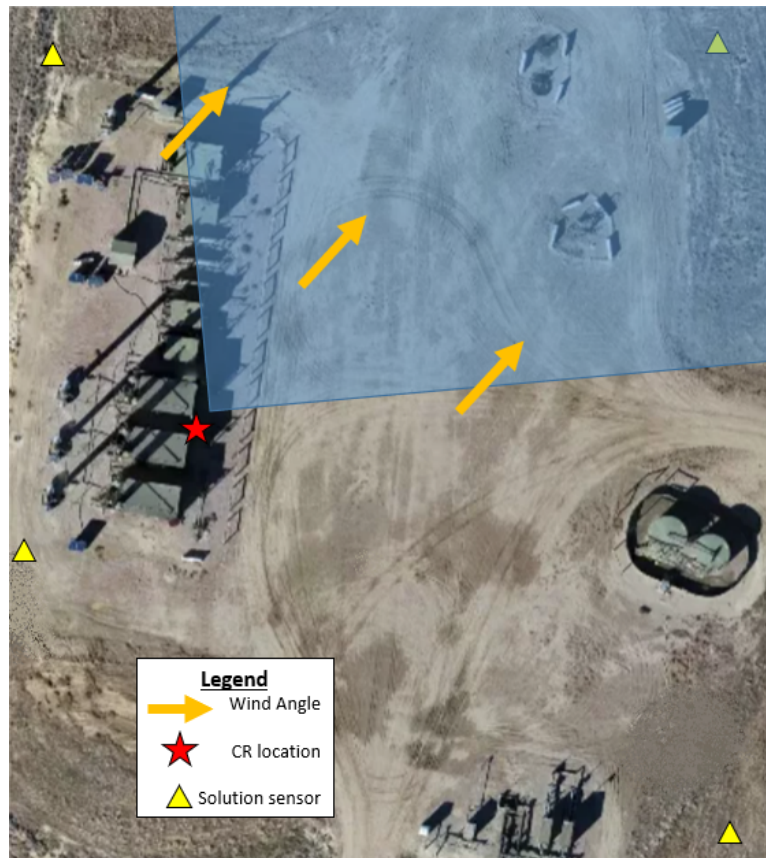

Figure S-11: Image shows an example of a challenge release location, wind angle, and area, in transparent blue, which is considered as a sensor being downwind of the challenge release location.

### S-3 Results and Discussion

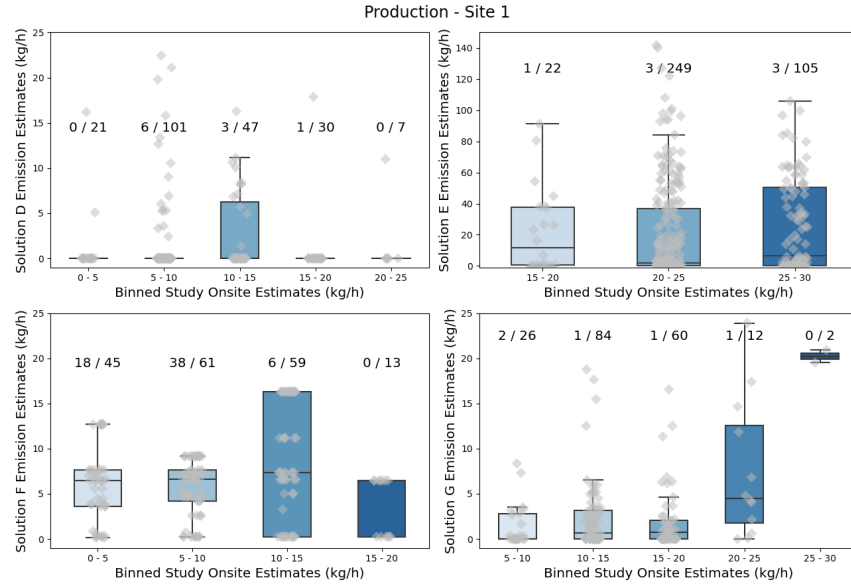

Figure S-12: Plots for Site 1 show the ratio of how many estimates were within the binned ChR rates over the total number of estimates that could have been made within the binned ChR rates. This number of possible estimates is slightly different for each solution at each site, as they provide estimates in different time intervals. Note that estimates of 0 kg/h are shown in the box and scatter plots, but not counted in the ratios.

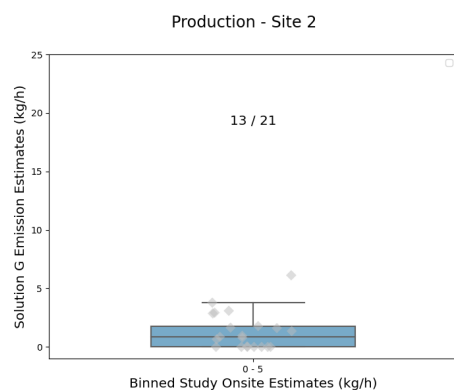

Figure S-13: Plots for Site 2 show the ratio of how many estimates were within the binned SOEs over the total number of estimates that could have been made within the binned SOEs. This number of possible estimates is slightly different for each solution at each site, as they provide estimates in different time intervals. Note that estimates of 0 kg/hr are shown in the box and scatter plots, but not counted in the ratios.

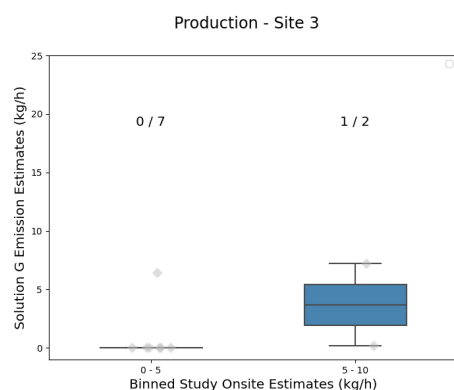

Figure S-14: Plots for Site 3 show the ratio of how many estimates were within the binned SOEs rates over the total number of estimates that could have been made within the binned SOEs rates. This number of possible estimates is slightly different for each solution at each site, as they provide estimates in different time intervals. Note that estimates of 0 kg/hr are shown in the box and scatter plots, but not counted in the ratios.

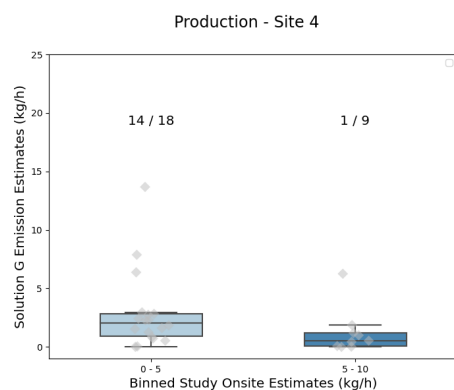

Figure S-15: Plots for Site 4 show the ratio of how many estimates were within the binned SOEs over the total number of estimates that could have been made within the binned SOEs. This number of possible estimates is slightly different for each solution at each site, as they provide estimates in different time intervals. Note that estimates of 0 kg/hr are shown in the box and scatter plots, but not counted in the ratios.

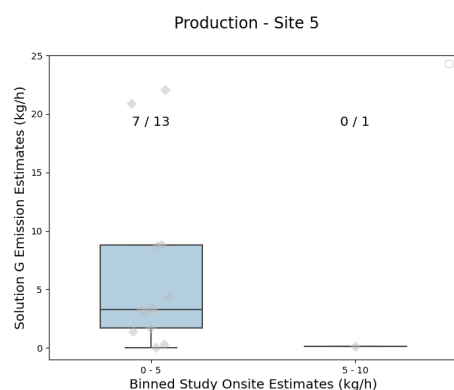

Figure S-16: Plots for Site 5 show the ratio of how many estimates were within the binned SOEs over the total number of estimates that could have been made within the binned SOEs. This number of possible estimates is slightly different for each solution at each site, as they provide estimates in different time intervals. Note that estimates of 0 kg/hr are shown in the box and scatter plots, but not counted in the ratios.

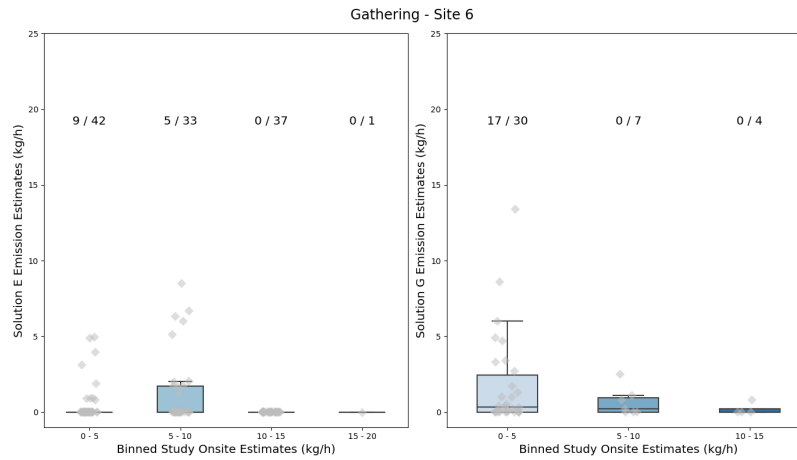

Figure S-17: Plots for Site 6 show the ratio of how many estimates were within the binned SOEs over the total number of estimates that could have been made within the binned SOEs. This number of possible estimates is slightly different for each solution at each site, as they provide estimates in different time intervals. Note that estimates of 0 kg/hr are shown in the box and scatter plots, but not counted in the ratios.

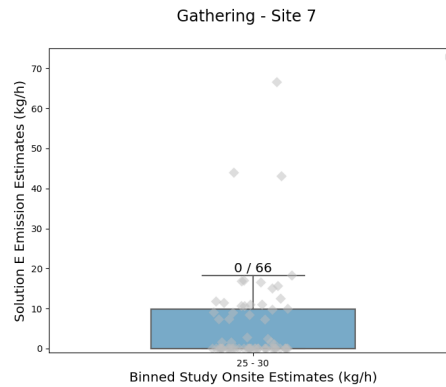

Figure S-18: Plots for Site 7 show the ratio of how many estimates were within the binned SOEs over the total number of estimates that could have been made within the binned SOEs. This number of possible estimates is slightly different for each solution at each site, as they provide estimates in different time intervals. Note that estimates of 0 kg/hr are shown in the box and scatter plots, but not counted in the ratios.

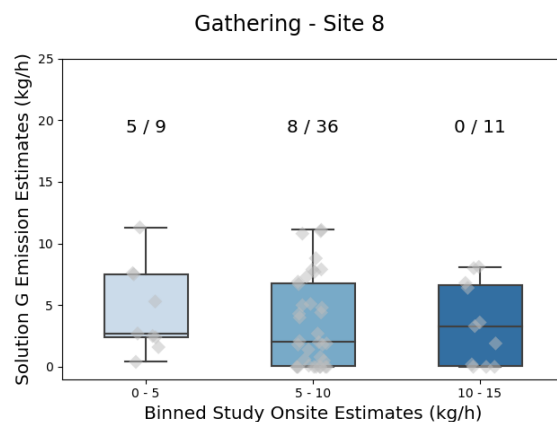

Figure S-19: Plots for Site 8 show the ratio of how many estimates were within the binned SOEs over the total number of estimates that could have been made within the binned SOEs. This number of possible estimates is slightly different for each solution at each site, as they provide estimates in different time intervals. Note that estimates of 0 kg/hr are shown in the box and scatter plots, but not counted in the ratios.

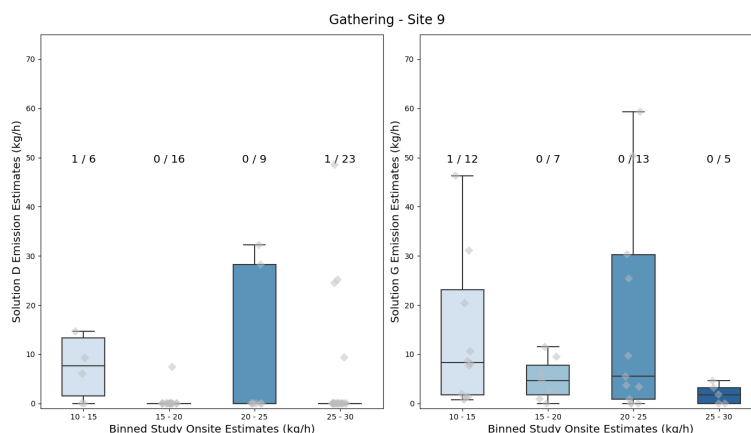

Figure S-20: Plots for Site 9 show the ratio of how many estimates were within the binned SOEs over the total number of estimates that could have been made within the binned SOEs. This number of possible estimates is slightly different for each solution at each site, as they provide estimates in different time intervals. Note that estimates of 0 kg/hr are shown in the box and scatter plots, but not counted in the ratios.

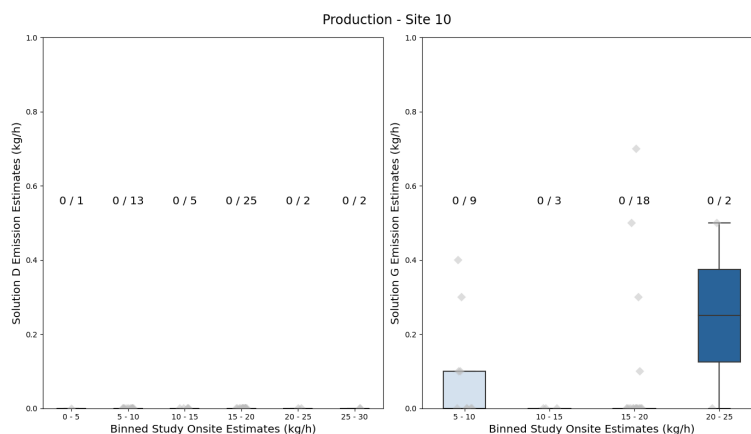

Figure S-21: Plots for Site 10 show the ratio of how many estimates were within the binned SOEs over the total number of estimates that could have been made within the binned SOEs. This number of possible estimates is slightly different for each solution at each site, as they provide estimates in different time intervals. Note that estimates of 0 kg/hr are shown in the box and scatter plots, but not counted in the ratios.

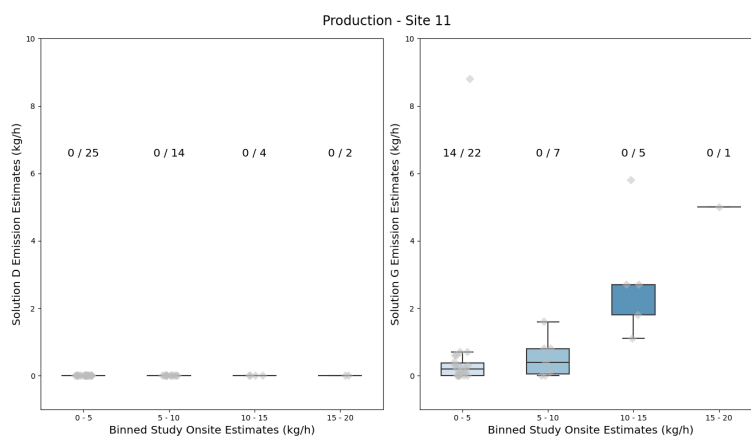

Figure S-22: Plots for Site 11 show the ratio of how many estimates were within the binned SOEs over the total number of estimates that could have been made within the binned SOEs. This number of possible estimates is slightly different for each solution at each site, as they provide estimates in different time intervals. Note that estimates of 0 kg/hr are shown in the box and scatter plots, but not counted in the ratios.



### S-3.1 Probability of Detection

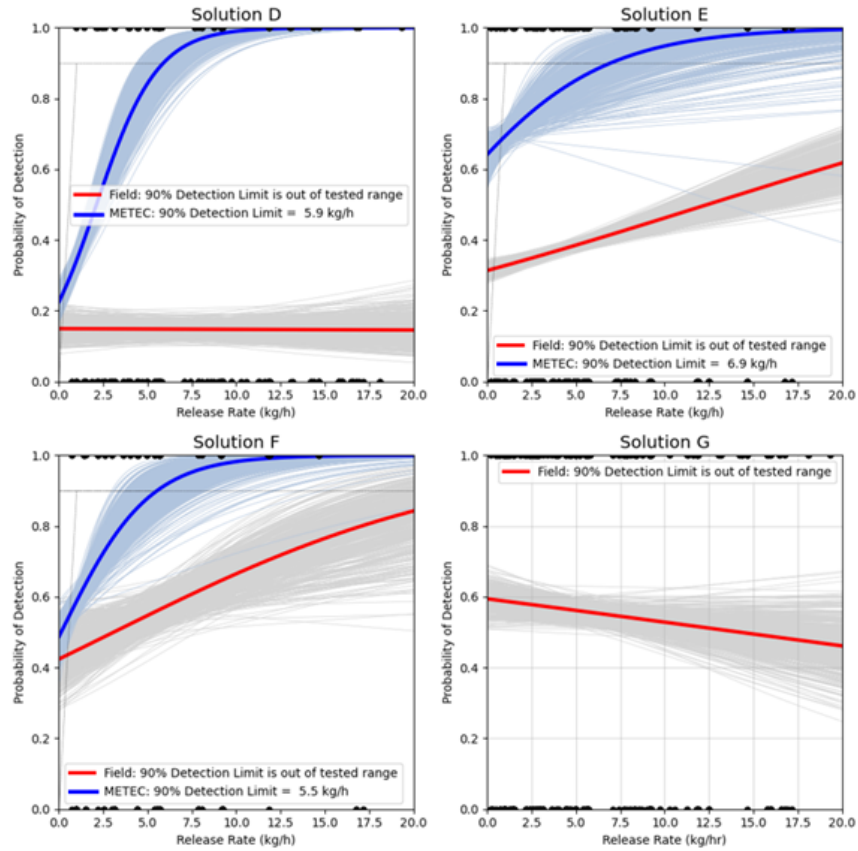

Figure S-23: Probability of detection as a logistic regression curve function of site rate estimates during challenge releases for all solutions during all deployments paired with their estimates made during METEC testing. The definition of detection, or a TP reading, for the field campaign includes any estimate above 0 kg/hr for solutions D, E, and G. As solution F does not have any 0 kg/hr estimates, the definition of detection is any estimate above 2.23 kg/hr, the BL site rate estimate, see *Methods*. Solution G did not participate in METEC testing.

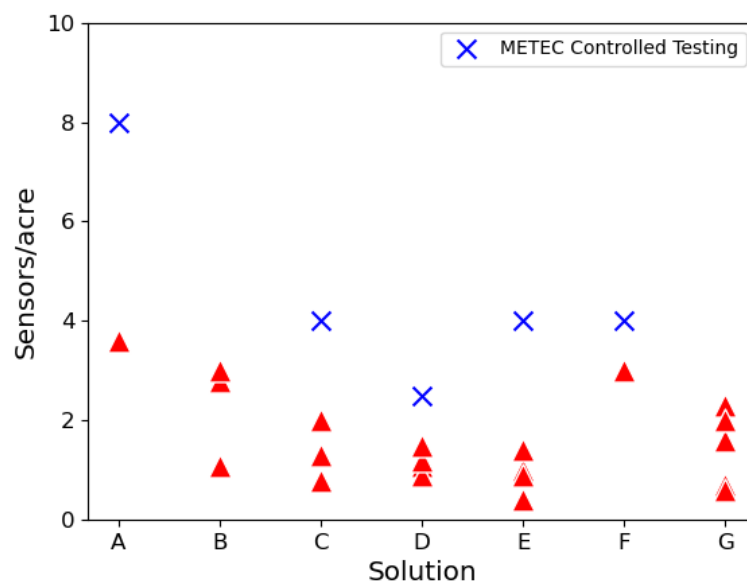

Figure S-24: Number of sensors per area by solution for METEC controlled releases and the field campaign's challenge releases. For the field campaign an average is taken across all sites.

### S-3.2 Mixing Ratio Results

Table S-2: Distances between point sensors and challenge releases (ChRs).

| Sensor distances from ChRs |                    |                    |                    |
|----------------------------|--------------------|--------------------|--------------------|
| <i>Site</i>                | <i>Minimum (m)</i> | <i>Maximum (m)</i> | <i>Average (m)</i> |
| Site 1                     | 17                 | 350                | 184                |
| Site 2                     | 39                 | 110                | 75                 |
| Site 3                     | 46                 | 100                | 73                 |
| Site 4                     | 44                 | 111                | 78                 |
| Site 5                     | 24                 | 82                 | 53                 |
| Site 6                     | 27                 | 132                | 78                 |
| Site 7                     | 37                 | 350                | 194                |
| Site 8                     | 60                 | 145                | 103                |
| Site 9                     | 43                 | 152                | 98                 |
| Site 10                    | 38                 | 102                | 70                 |
| Site 11                    | 22                 | 92                 | 57                 |

### S-3.3 Site Rate Quantification Results

Table S-3: Baseline (BL) emission estimates (kg/h) at each facility by each solution. Significant variability exists between baseline emissions assessed by solutions deployed at the same facility.

| Site Baselines |                  |            |            |            |            |
|----------------|------------------|------------|------------|------------|------------|
| <i>Site</i>    | <i>Site Type</i> | <i>(D)</i> | <i>(E)</i> | <i>(F)</i> | <i>(G)</i> |
| Site 1         | Production       | 3.4        | 19.1       | 2.2        | 7.8        |
| Site 2         | Production       | -          | -          | -          | 0.3        |
| Site 3         | Production       | -          | -          | -          | 0.5        |
| Site 4         | Production       | -          | -          | -          | 1.4        |
| Site 5         | Production       | -          | -          | -          | 0.1        |
| Site 6         | Compressor       | -          | 0.9        | -          | 0.3        |
| Site 7         | Gas plant        | -          | 26.8       | -          |            |
| Site 8         | Compressor       | -          | 70.6       | -          | 4.2        |
| Site 9         | Compressor       | 12.5       | -          | -          | 9.1        |
| Site 10        | Production       | 0.3        | -          | -          | 0.2        |
| Site 11        | Production       | 0.0        | -          | -          | 0.7        |

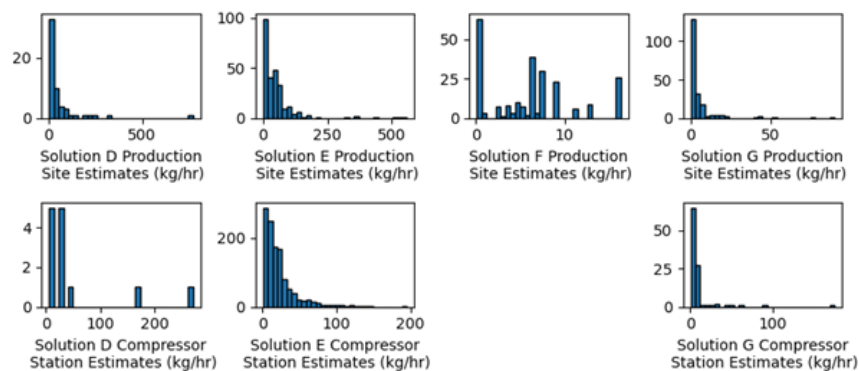

Figure S-25: Histograms show the distribution of site rate estimates from the whole field campaign for each solution with the top row showing production sites and the lower row showing compressor stations.

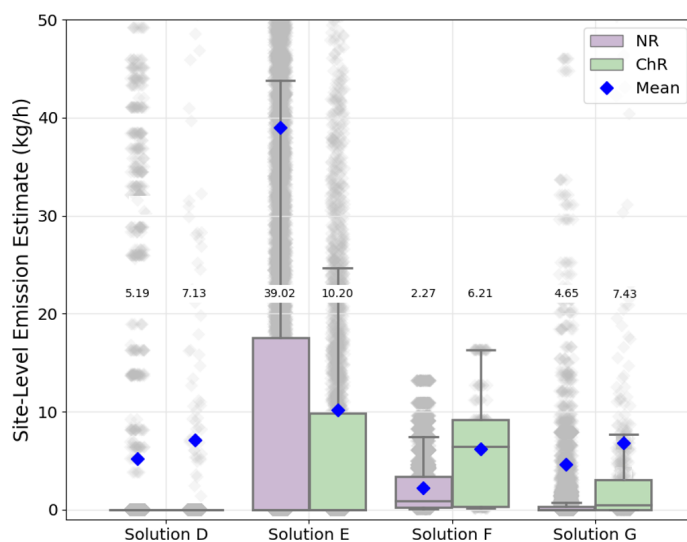

Figure S-26: Averages of site-level emission estimates when ChRs were occurring and when no releases were occurring.
